# Supplementary material for: Lack of Association Between Genetic Variants at ACE2 and TMPRSS2 Genes Involved in SARS-CoV-2 Infection and Human Quantitative Phenotypes
Source: Front Genet. 2020 Jun 8;11:613. doi: 10.3389/fgene.2020.00613 (PMC7295011; doi:10.3389/fgene.2020.00613)
Supplement: Supplementary file 4 [file Table_4.xlsx]

## Sheet: a_counts_medications
Supplementary Table 4a. Number of users for single medications
We report the number of users for single medications in categories listed in Table 2. For completeness, we also report number of users in each category and the number of males and females only users
Description	atc_code_point	n_individuals	n_males	n_females	Notes
Category	C09D	202	88	114
Losartan with Diuretics	C09DA01	42	18	24
Valsartan with Diuretics	C09DA03	29	8	21
Irbesartan with Diuretics	C09DA04	86	45	41
Losartan with Diuretics	C09DA06	15	6	9
Telmisartan with Diuretics	C09DA07	23	10	13
Losartan with Diuretics	C09DA08	1	0	1
Olmesartan with Amlodipine	C09DB02	4	0	4
Valsartan, Amlodipine and Hydrochlorothiazide	C09DX01	2	1	1
Category	D07A	981	375	606	// Some individuals are registered to take more than one of these drugs, so the sum of the number of users is not identical to the total users of the drug category
Hydrocortisone	D07AA02	144	63	81
Prednisolone	D07AA03	1	0	1
Clobetasone	D07AB01	25	12	13
Hydrocortisone butyrate	D07AB02	52	15	37
Flumetasone	D07AB03	1	0	1
Triamcinolon	D07AB09	267	110	157
Betamethasone	D07AC01	103	42	61
Desoximetasone	D07AC03	35	13	22
Diflucortolone	D07AC06	2	0	2
Mometasone furoate	D07AC13	117	43	74
Beclometasone	D07AC15	1	1	0
Fluticasone	D07AC17	65	22	43
Clobetasol	D07AD01	168	54	114
Category	J02A	523	234	289
Antimycotics for systemic use	J02A	4	2	2	//only 4 characters recorded for these individuals
Antibiotics	J02AA	458	215	243	//only 5 characters recorded for these individuals
Miconazole	J02AB01	4	3	1
Ketoconazole	J02AB02	6	2	4
Fluconazole	J02AC01	31	1	30
Itraconazole	J02AC02	19	10	9
Posaconazole	J02AC04	1	1	0
Category	M01A	1314	415	899	// Some individuals are registered to take more than one of these drugs, so the sum of the number of users is not identical to the total users of the drug category
Phenylbutazone	M01AA01	1	1	0
Indometacin	M01AB01	27	5	22
Diclofenac	M01AB05	526	191	335
Aceclofenac	M01AB16	3	1	2
Diclofenac, combinations	M01AB55	41	17	24
Pirxicam	M01AC01	9	3	6
Meloxicam	M01AC06	85	20	65
Ibuprofen	M01AE01	233	59	174
Naproxen	M01AE02	235	62	173
Ketoprofen	M01AE03	3	2	1
Dexibuprofen	M01AE14	1	0	1
Celecoxib	M01AH01	29	13	16
Etorixoxib	M01AH05	58	22	36
Glucosamine	M01AX05	60	19	41
Chondrotin sulfate	M01AX25	3	0	3

## Sheet: b_association_results
Supplementary Table 4b. Association results at single medications
We reported association results for single medications in categories reported in Table 2. We only analyzed medications used by at least 100 samples in total genotyped cohort (see Supplementary Table 4a), and only at SNPs reported in Table 2.
The table indicates if association parameters refers to an analyses that includes both males and females (combined) or only a specific sex (females only, males only). Odds Ratio refers to the alternative allele.
ACT CODE	Medication name	analysis type	Chr	Position	snp_name	ref_allele	alt_allele	OR	95%C.I._lower	95%C.I._upper	p
D07AB09	Triamcinolon	males only	21	42920296	rs9975623	A	G	1.92064	1.42581	2.5872	1.66e-05
D07AB09	Triamcinolon	combined	21	42920296	rs9975623	A	G	1.46961	1.2197	1.77074	5.15e-05
J02AA	Antibiotics	combined	21	42792485	rs457274	C	G	1.29175	1.11211	1.50042	0.000816
J02AA	Antibiotics	females only	21	42792485	rs457274	C	G	1.35391	1.1023	1.66297	0.0039
M01AE02	Naproxen	males only	X	15597568	rs4646190	A	G	2.08441	1.14647	3.7897	0.016016
D07AD01	Clobetasol	females only	21	42920296	rs9975623	A	G	1.40354	1.05819	1.8616	0.01865
D07AD01	Clobetasol	combined	21	42920296	rs9975623	A	G	1.29823	1.02875	1.63829	0.0279
D07AA02	Hydrocortisone	females only	21	42920296	rs9975623	A	G	1.40354	1.00424	1.96161	0.04731
M01AE01	Ibuprofen	combined	X	15597568	rs4646190	A	G	1.47403	0.997571	2.17805	0.05124
M01AE01	Ibuprofen	females only	X	15597568	rs4646190	A	G	1.62905	0.977865	2.71389	0.06085
J02AA	Antibiotics	males only	21	42792485	rs457274	C	G	1.21047	0.975707	1.50171	0.0821
M01AB05	Diclofenac	males only	X	15597568	rs4646190	A	G	1.34672	0.959248	1.8907	0.085432
D07AA02	Hydrocortisone	combined	21	42920296	rs9975623	A	G	1.24234	0.966688	1.59661	0.0897
D07AB09	Triamcinolon	females only	21	42920296	rs9975623	A	G	1.22262	0.961655	1.55442	0.10173
M01AB05	Diclofenac	combined	X	15597568	rs4646190	A	G	1.20804	0.939996	1.55252	0.13942
D07AC13	Mometasone furoate	females only	21	42920296	rs9975623	A	G	0.787415	0.562075	1.1031	0.16442
M01AE02	Naproxen	combined	X	15597568	rs4646190	A	G	1.28788	0.875875	1.8937	0.19799
D07AC13	Mometasone furoate	combined	21	42920296	rs9975623	A	G	0.865888	0.654882	1.14488	0.312
D07AC01	Betamethasone	combined	21	42920296	rs9975623	A	G	1.15373	0.857323	1.55261	0.344
M01AE01	Ibuprofen	males only	X	15597568	rs4646190	A	G	1.26029	0.689527	2.30351	0.452206
D07AC01	Betamethasone	females only	21	42920296	rs9975623	A	G	1.15835	0.788247	1.70224	0.4537
D07AC01	Betamethasone	males only	21	42920296	rs9975623	A	G	1.14746	0.719697	1.82949	0.563
D07AD01	Clobetasol	males only	21	42920296	rs9975623	A	G	1.09963	0.728605	1.6596	0.651
M01AE02	Naproxen	females only	X	15597568	rs4646190	A	G	0.902127	0.540879	1.50465	0.69295
D07AA02	Hydrocortisone	males only	21	42920296	rs9975623	A	G	1.0595	0.722962	1.55271	0.767
M01AB05	Diclofenac	females only	X	15597568	rs4646190	A	G	1.05559	0.729669	1.52709	0.77408
D07AC13	Mometasone furoate	males only	21	42920296	rs9975623	A	G	1.04805	0.661223	1.66119	0.842
